# Supplementary material for: Retro-Inversion Imparts Antimycobacterial Specificity to Host Defense Peptides
Source: Research Square preprint supplement (doi:10.21203/rs.3.rs-6497899/v1), 2025-05-05
Supplement: Supplementary file 1 [file 11b62dec3de0996175ead79f.docx]

**Supporting Information**

**Retro-Inversion Imparts Antimycobacterial Specificity to Host Defense Peptides**

Hugh D. Glossop,Gebremichal Gebretsadik,Sabiha Sultana, Nathan A. Schacht, Neela H. Yennawar, Diptomit Biswas, Anthony D. Baughn, Scott H. Medina

Content Page Number

**Supplementary Table S1.** Tabulated peptide mass and purity  **S3**

**Supplementary Table S2.** MAD1-RI activity towards clinical *Mtb* isolates  **S4**

**Supplementary Fig. S1.** Structure of MAD1 and MAD1-RI with trehalose dimycolate **S5**

**Supplementary Fig. S2.** CD spectra of MAD1-RI at 70 – 95°C temperatures  **S6**

**Supplementary Fig. S3.** Checkboard results for MAD1-RI and antibiotic combinations **S7**

**Supplementary Fig. S4.** Antibiotic kill kinetics in proliferating *Mtb* cultures **S8**

**Supplementary Fig. S5.** Antibiotic kill kinetics in dormant *Mtb* cultures **S9**

**Supplementary Fig. S6.** MAD1 and MAD1-RI kill kinetics in hypoxic *Mtb* cultures  **S10**

**Supplementary Fig. S7.** RNA sequencing principal components analysis  **S11**

**Table S1:** Sequence identity, analytical properties, and synthetic purity.

| No. | Peptide ID | Sequence​a | Mass  (Da)​ | Calculated MS Ion Peaks  (M+5, M+4, M+3, M+2)​ | Observed MS Ion Peaks  (M+5, M+4, M+3, M+2)​ | Purity​ |
| --- | --- | --- | --- | --- | --- | --- |
| 1 | MAD 1 | KRWHWWRRHWVVW | 2017.4​ | 404.5, 505.3, 673.4, 1009.6 | 405, 505, 673,1009 | 93.5% |
| 2 | MAD1-R | WVVWHRRWWHWRK | 2017.4​​ | 404.5, 505.3, 673.4, 1009.6 | 405, 506, 674, 1010 | 91.6% |
| 3 | MAD1-I | krwhwwrrhwvvw | 2017.4​​ | 404.5, 505.3, 673.4, 1009.6 | 405, 505, 674, 1009 | 95.6% |
| 4 | MAD1-RI | wvvwhrrwwhwrk | 2017.4​​ | 404.5, 505.3, 673.4, 1009.6 | 404, 505, 673, 1009 | 95.9% |
| 5 | MAD2.2 | RRWRWWKVHWHEW | 2047.3 | 410.5, 512.8, 683.5, 1024.7 | 411, 513, 683, 1025 | 92.9% |
| 6 | MAD2.2-RI | wehwhvkwwrwrr | 2047.3 | 410.5, 512.8, 683.5, 1024.7 | 410, 513, 683, 1024 | 98.9% |
| 7 | MAD5.1 | RLRKFRRRFRKEG | 1804.2​ | 361.8, 452, 602.4, 903 | 362, 452, 603, 903 | 97.8% |
| 8 | MAD5.1-RI | Gekrfrrrfkrlr | 1804.2​ | 361.8, 452, 602.4, 903 | 362, 452, 602, 903 | 98.2% |
| 9 | Latarcin 3a | SWKSMAKKLKEYMEKLKQRA | 2483.0​ | 497.6, 621.8, 828.7, 1242.5 | 498, 622, 829, 1242 | 98.2% |
| 10 | Latarcin 3a-RI | arqklkemyeklkkamskws | 2483.0​​ | 497.6, 621.8, 828.7, 1242.5 | 498, 622, 829 | 95.5% |
| 11 | Euminitin F | LNLKGLFKKVASLLT | 1644.1 | 329.8, 412.0, 549.0, 823.0 | 412, 549, 823 | 99.0% |
| 12 | Euminitin F-RI | tllsavkkflGklnl | 1644.1 | 329.8, 412.0, 549.0, 823.0 | 412, 549, 823 | 98.5% |
| 13 | Pinipesin F | VAEARQGSFSY | 1213.3 | 152.3, 304.3, 405.3, 607.5 | 608 | 97.1% |
| 14 | Pinipesin F-RI | ysfsGqraeav | 1213.3 | 152.3, 304.3, 405.3, 607.5 | 608 | 92.7% |

aAll sequences prepared with amidated C-terminus

**Table S1:** Activity of MAD1-RI and Isoniazid (drug control) against the indicated *Mtb* clinical isolate, as determined by visual inspection and optical density measurements (OD570).

| Mtb clinical isolate | **MIC** | | | |
| --- | --- | --- | --- | --- |
| **Visual Inspection** | | **OD570** | |
| MAD1RI (µM) | Isoniazid (µg/ml) | MAD1RI (µM) | Isoniazid (µg/ml) |
| N0004 | 20 | 1.25 | 20 | 1.25 |
| N0052 | 40 | 1.25 | 40 | 1.25 |
| N0072 | 10 | 1.25 | 20 | 2.5 |
| N0091 | 20 | 1.25 | 40 | 1.25 |
| N0136 | 20 | 1.25 | 20 | 1.25 |
| N0145 | 20 | 0.625 | 20 | 0.625 |
| N0155 | 20 | 1.25 | 20 | 1.25 |
| N1063 | 40 | >10 | 40 | >10 |
| N1177 | 20 | 1.25 | 20 | 1.25 |
| N1272 | 20 | 1.25 | 40 | 1.25 |
| N1274 | 20 | 0.625 | 20 | 0.625 |
| N1283 | 20 | 1.25 | 20 | 1.25 |

**
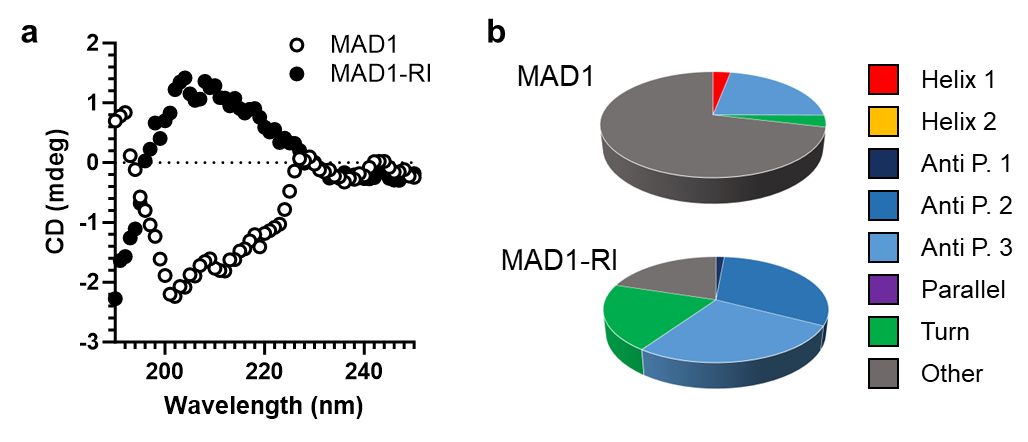
**

**Figure S1:** (**a**,**b**) CD spectra (a) and BeStSeL structural classification of MAD1 and MAD1-RI in the presence of the mycobacterial outer membrane glycolipid, trehalose dimycolate.

**Figure S2:** CD spectra of MAD1-RI in physiologic buffer at 70 – 95°C temperatures.

**
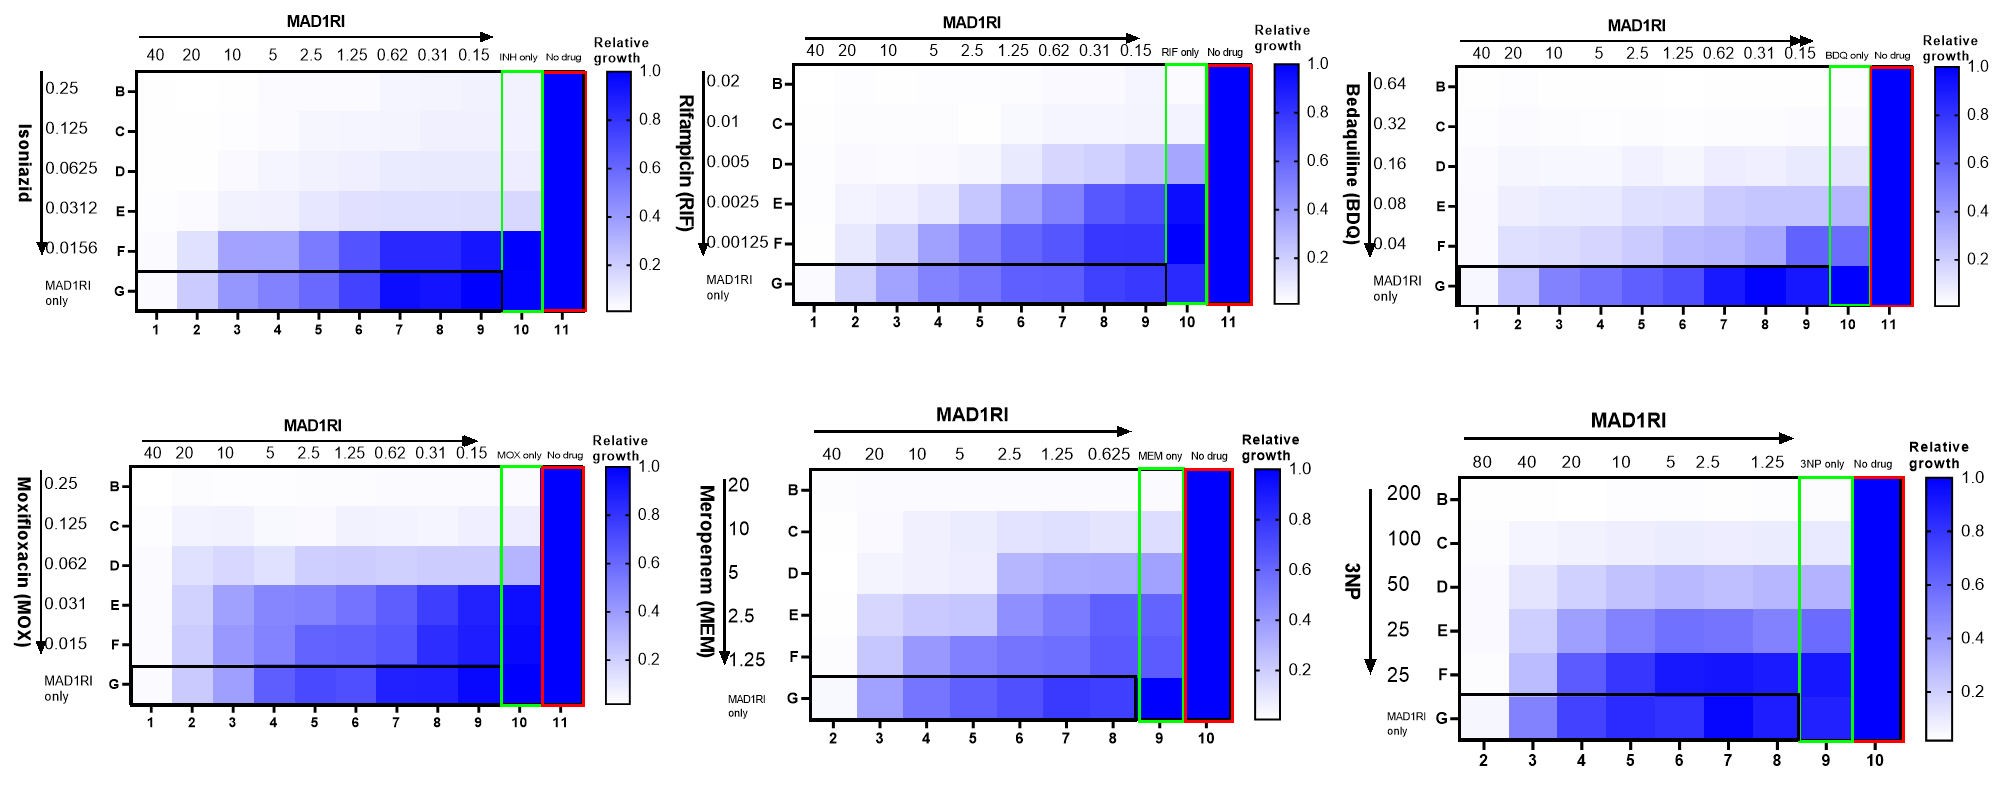
Figure S3**: Representative checkboard results for antibiotics that displayed additive or synergistic activity with MAD1-RI.

**
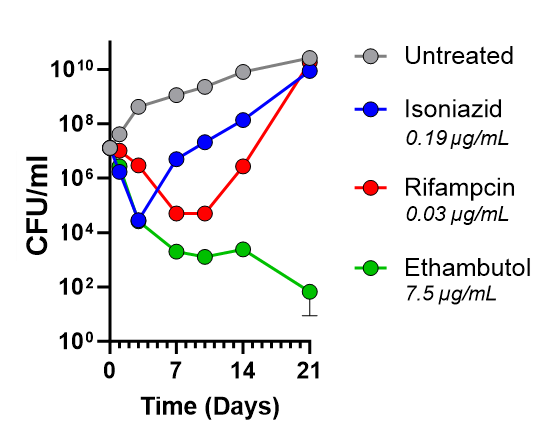
**

**Figure S4:** Time-dependent kill kinetics of Isoniazid, Rifampicin and Ethambutol in proliferating *Mtb* (H37Rv) cultures at the indicated concentration.


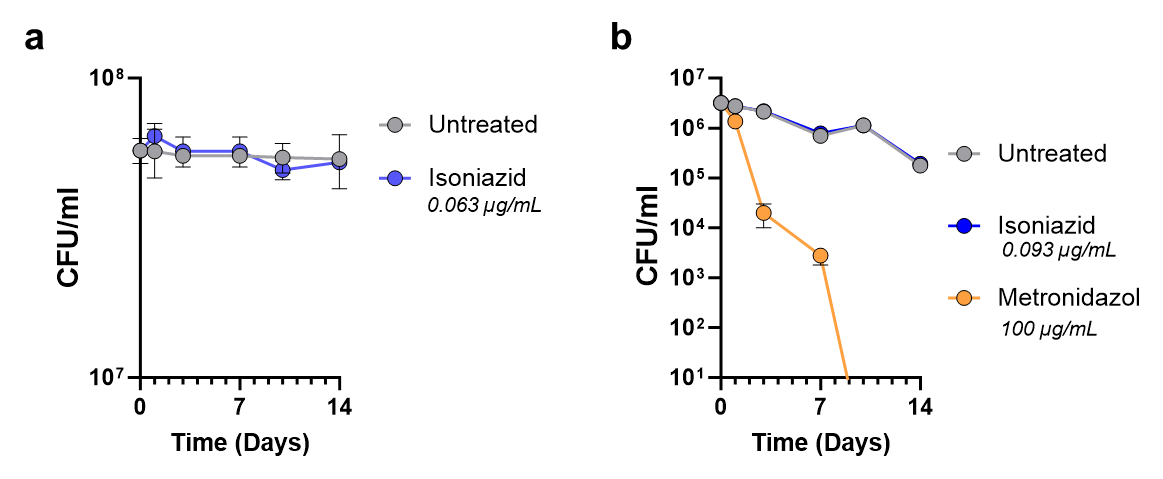


**Figure S5:** Time-dependent kill kinetics of the indicated antibiotic in (**a**) H37Rv cultures under nutrient starvation conditions, or (**b**) H37Ra cultures under hypoxic conditions. Untreated controls in a and b are the same as in Figure 4e and Figure 4f, respectively.

**Figure S6:** Time-dependent kill kinetics of MAD1 and MAD1-RI in hypoxic H37Ra cultures. Untreated control is the same as Figure 4f.


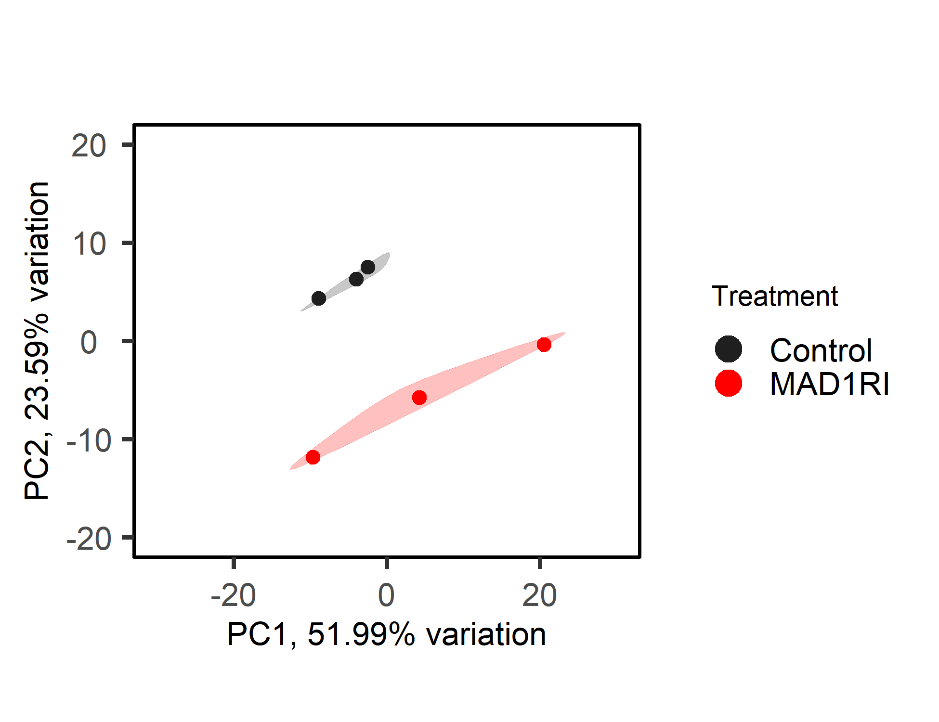


**Figure S7:** Principal components analysis of RNA sequencing samples prepared from untreated (black) or MAD1-RI exposed (red) *Mtb* H37Rv cultures.
